# Supplementary material for: Boron and nitrogen-rich carbons from ionic liquid precursors with tailorable surface properties
Source: Royal Society of Chemistry journal article supplement (doi:10.1039/c1cp20631a), 2011-01-01
Supplement: c1cp20631a.pdf [file c1cp20631a.pdf]

## Boron and nitrogen-rich carbons from ionic liquid precursors with tailorable surface properties

Pasquale F. Fulvio,<sup>a</sup> Je Seung Lee,<sup>\*b</sup> Richard T. Mayes,<sup>a</sup> Xiqing Wang,<sup>a,‡</sup> Shannon M. Mahurin,<sup>a</sup> and Sheng Dai<sup>\*a</sup>

<sup>a</sup> Chemical Sciences Division, Oak Ridge National Laboratory, 1 Bethel Valley Road, Oak Ridge, TN 37831, United State.

<sup>b</sup> Department of Chemistry, Kyung Hee University, 1 Hoegi-dong, Dongdaemoon-gu, Seoul 130-701, Korea.

<sup>‡</sup> Current Address: Nanotek Instruments, Inc., Dayton, OH 45404

**Table S1.** Adsorption and physical properties of carbon materials from [BMIm][C(CN)<sub>3</sub>] and [EMIm][B(CN)<sub>4</sub>] TSILs at various temperatures.

| IL ratio                    |                             | Yield (%)         | S <sub>BET</sub> (m <sup>2</sup> g <sup>-1</sup> ) |
|-----------------------------|-----------------------------|-------------------|----------------------------------------------------|
| [BMIm][C(CN) <sub>3</sub> ] | [EMIm][B(CN) <sub>4</sub> ] |                   |                                                    |
| 1                           |                             | 37.2 <sup>a</sup> | 2.4                                                |
| 1                           |                             | 22.5 <sup>c</sup> | 64.8                                               |
|                             | 1                           | 46.4 <sup>a</sup> | 1.9                                                |
|                             | 1                           | 37.7 <sup>c</sup> | 13.6                                               |
| 1                           | 2                           | 37.8 <sup>a</sup> | 319                                                |
| 1                           | 1                           | 40.6 <sup>a</sup> | 11.5                                               |
| 2                           | 1                           | 41.7 <sup>a</sup> | 4.2                                                |
| 1                           | 2                           | 34.4 <sup>b</sup> | 388                                                |
| 1                           | 1                           | 35.5 <sup>b</sup> | 279                                                |
| 2                           | 1                           | 36.2 <sup>b</sup> | 37                                                 |
| 1                           | 2                           | 29.6 <sup>c</sup> | 537                                                |
| 1                           | 1                           | 29.2 <sup>c</sup> | 188                                                |
| 2                           | 1                           | 28.9 <sup>c</sup> | 124                                                |
| 1                           | 2                           | 25.8 <sup>d</sup> | 286                                                |
| 1                           | 1                           | 15.8 <sup>d</sup> | 290                                                |
| 2                           | 1                           | 21.2 <sup>d</sup> | 97                                                 |

<sup>a</sup> Temperature = 450°C, ramp rate = 10°C min<sup>-1</sup>, dwell time = 2 h.

<sup>b</sup> Temperature = 550°C, ramp rate = 10°C min<sup>-1</sup>, dwell time = 1 h.

<sup>c</sup> Temperature = 800°C, ramp rate = 10°C min<sup>-1</sup>, dwell time = 1 h.

<sup>d</sup> Temperature = 900°C, ramp rate = 10°C min<sup>-1</sup>, dwell time = 1 h.

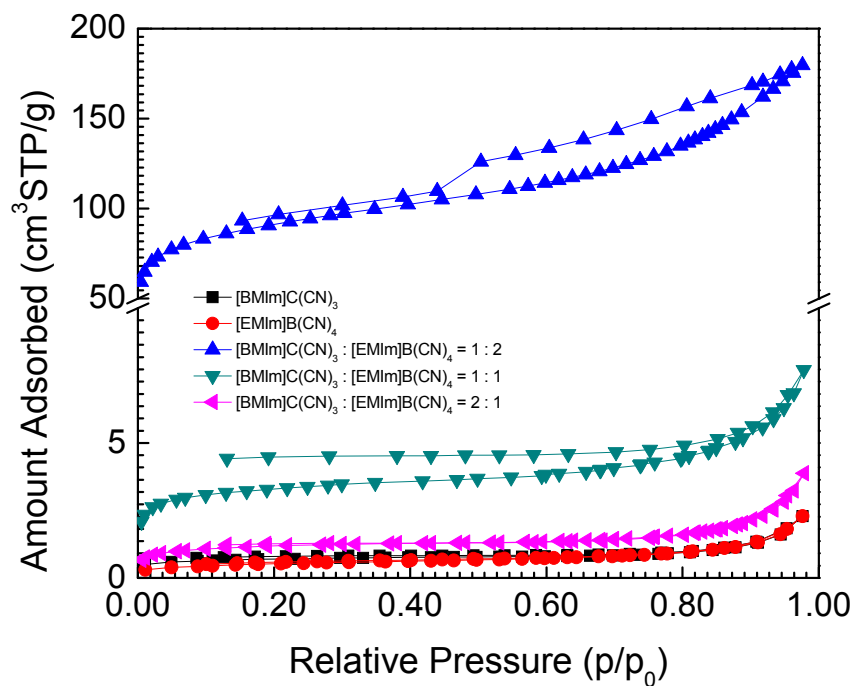

(a)

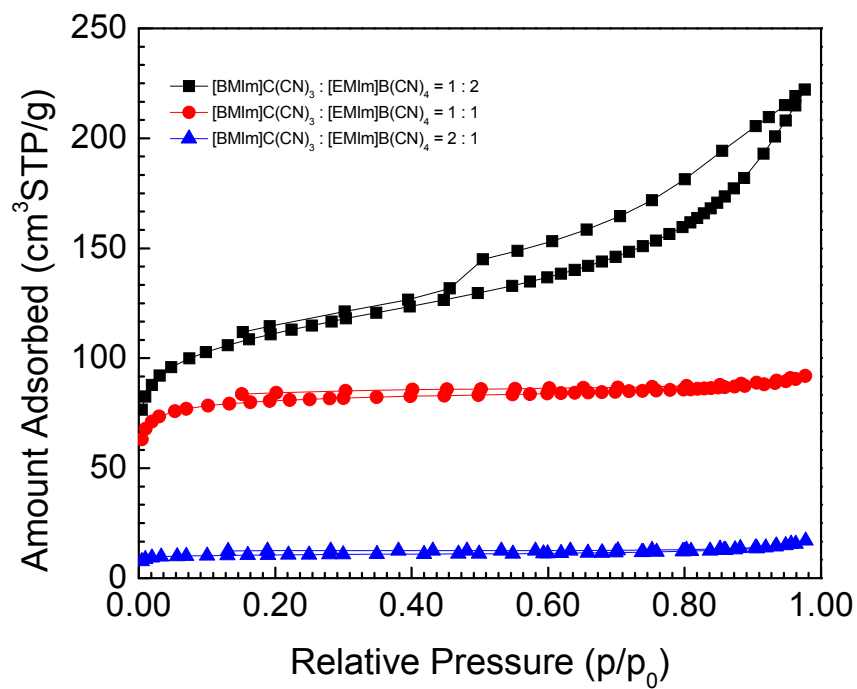

(b)

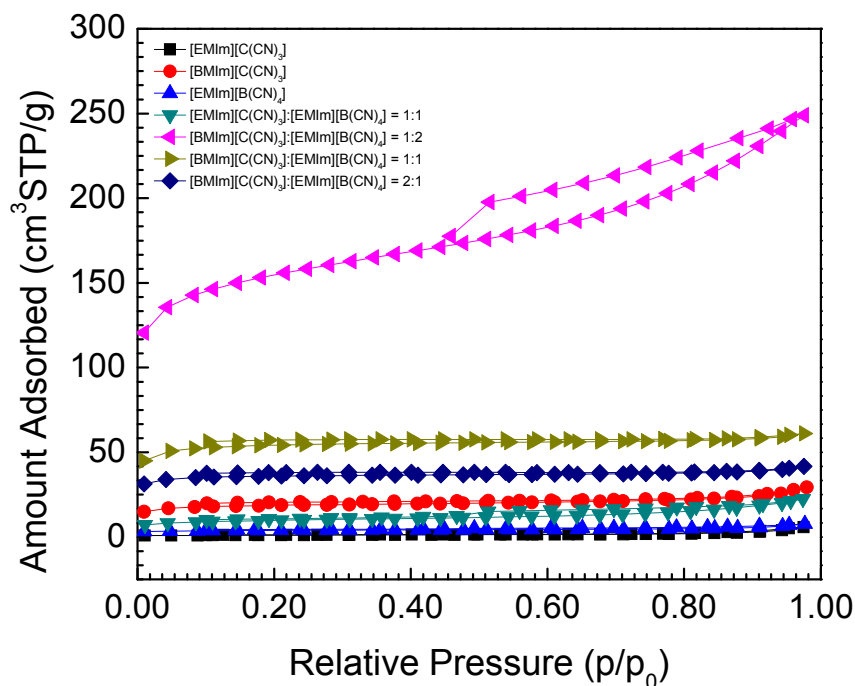

(c)

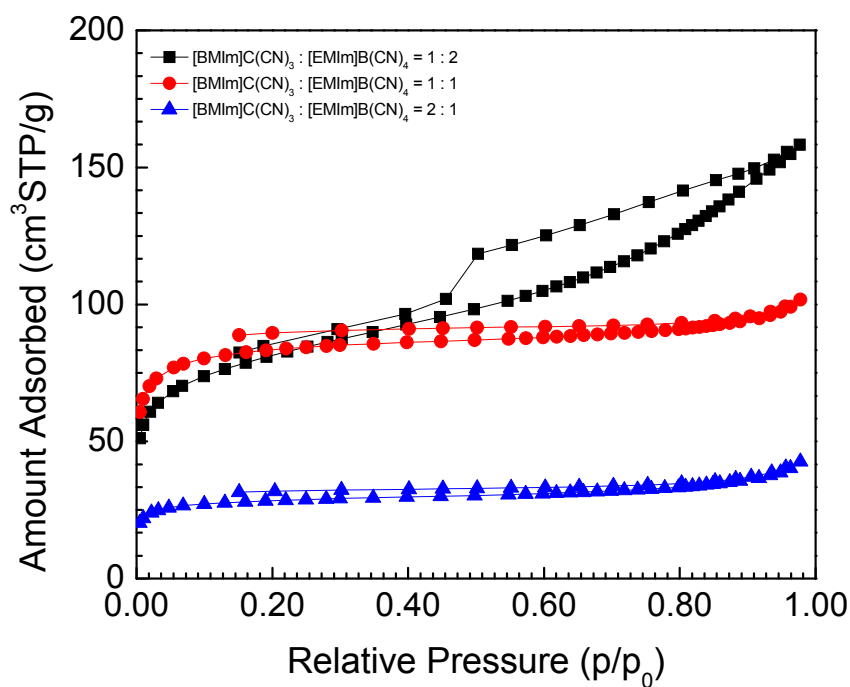

(d)

**Fig. S1.** Nitrogen adsorption isotherms for various carbonaceous materials prepared from pure [EMIm][B(CN)<sub>4</sub>] and [BMIm][C(CN)<sub>3</sub>] and their mixtures carbonized at 450°C (a), 550°C (b), 800°C (c) and 900°C (d) under flowing nitrogen atmosphere.

**Table S2.** Elemental analysis results from EDX for carbonaceous materials derived from [BMIm][C(CN)<sub>3</sub>] and [EMIm][B(CN)<sub>4</sub>] after carbonizations at various temperatures.

| Sample                      |                             | T (°C) <sup>a</sup> | B (wt. %) <sub>b</sub> | C (wt. %) <sub>c</sub> | N (wt. %) <sub>d</sub> |
|-----------------------------|-----------------------------|---------------------|------------------------|------------------------|------------------------|
| [EMIm][B(CN) <sub>4</sub> ] | [BMIm][C(CN) <sub>3</sub> ] |                     |                        |                        |                        |
| 1                           | 0                           | 800                 | 46.7                   | 45.8                   | 7.5                    |
| 0                           | 1                           | 800                 | -                      | 84.2                   | 15.8                   |
| 1                           | 1                           | 800                 | 31.1                   | 62.8                   | 6.1                    |
| 1                           | 2                           | 800                 | 23.5                   | 71.6                   | 4.9                    |
| 2                           | 1                           | 450                 | 32.5                   | 58.1                   | 9.4                    |
| 2                           | 1                           | 550                 | 23.6                   | 69.0                   | 7.4                    |
| 2                           | 1                           | 800                 | 30.5                   | 64.2                   | 5.3                    |
| 2                           | 1                           | 900                 | 32.0                   | 64.0                   | 4.0                    |

<sup>a</sup>Carbonization temperature.

Weight percentages from the K lines for <sup>b</sup>boron, <sup>c</sup>carbon, and <sup>d</sup>nitrogen.
